# Supplementary material
Source: publisher figshare collection journal article supplement (https://springernature.figshare.com/ndownloader/files/20474478)
Supplement: Supplementary file [file 20474478]

The founders  
of Lamleh  
lineage

**Rajah**

**Bunti**

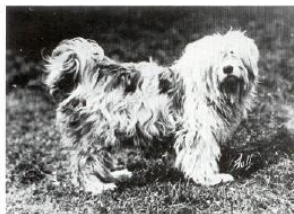

Lamleh

1930

The founders  
of Luneville  
lineage

**Dusky Trojan Kynos**, a  
stray dog found in  
Liverpool in 1953

**Princess Aureus**

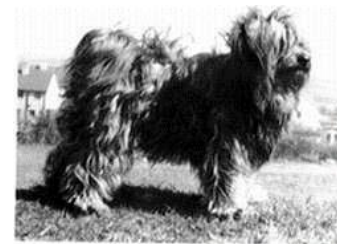

Luneville

1953
